# Supplementary material for: Bacterial communities in the gastrointestinal tract segments of helminth-resistant and helminth-susceptible sheep
Source: Research Square preprint supplement (doi:10.21203/rs.3.rs-497695/v1), 2021-05-13
Supplement: Supplementary file 1 [file 35d11d3aaaa5f8fbe42e9655.xlsx]

## Sheet: Mefit_summary_stats
Sample ID	Segment	Total raw reads	Post trimming	Post merging and filtering	Average read length (bp)
5020A	Abomasum	40014	11774	9325	448
5020Ce	Caecum	61800	22319	17252	448
5020Cl	Colon	46847	17941	14503	449
5020D	Duodenum	91632	32338	26759	446
5020F	Faeces	50535	14884	11369	448
5020I	Ileum	90843	35891	27514	443
5020J	Jejunum	176382	86801	25461	450
5020R	Rumen	67874	24488	19407	454
5061A	Abomasum	26181	10214	8771	451
5061Ce	Caecum	68054	26234	21464	447
5061Cl	Colon	47990	14272	11775	447
5061D	Duodenum	74292	23365	19572	446
5061F	Faeces	76832	27120	21585	447
5061I	Ileum	73892	28689	21248	460
5061J	Jejunum	212844	80149	59411	448
5061R	Rumen	49430	16334	13147	456
5088A	Abomasum	71911	24813	19600	452
5088Ce	Caecum	55940	21199	16884	450
5088Cl	Colon	54959	19586	15949	447
5088D	Duodenum	35050	14437	13196	445
5088F	Faeces	93229	19741	15468	447
5088I	Ileum	75399	14839	10582	445
5088J	Jejunum	81553	23383	18885	443
5088R	Rumen	52702	18348	14505	453
5146A	Abomasum	36529	13717	12164	450
5146Ce	Caecum	51965	19185	15464	448
5146Cl	Colon	49289	13812	11375	449
5146D	Duodenum	77209	20159	16361	445
5146F	Faeces	47889	14325	11151	447
5146I	Ileum	72368	27210	21777	445
5146J	Jejunum	145891	67293	33224	444
5146R	Rumen	41869	12338	10096	454
5199A	Abomasum	32061	12478	10772	451
5199Ce	Caecum	78041	23574	18389	447
5199Cl	Colon	43820	17254	13683	449
5199D	Duodenum	29828	11240	8920	447
5199F	Faeces	68313	22660	18040	447
5199I	Ileum	197850	94497	57511	442
5199J	Jejunum	220603	137653	4751	445
5199R	Rumen	28183	10057	7896	455
5413A	Abomasum	29997	11570	8651	451
5413Ce	Caecum	49731	17148	13546	447
5413Cl	Colon	46433	15802	13055	447
5413D	Duodenum	33391	14030	12885	446
5413F	Faeces	61811	22868	18248	446
5413I	Ileum	186204	87244	57712	453
5413J	Jejunum	153864	85590	15447	448
5413R	Rumen	53805	17198	13678	455
5474A	Abomasum	30220	12077	9866	453
5474Ce	Caecum	84298	32334	24388	453
5474Cl	Colon	47498	16479	13556	451
5474D	Duodenum	124770	54953	37713	447
5474F	Faeces	53398	15865	11887	450
5474I	Ileum	186249	92445	36697	455
5474J	Jejunum	168556	70211	31020	448
5474R	Rumen	71691	23128	19035	452
5568A	Abomasum	33362	14449	13378	444
5568Ce	Caecum	72472	25168	19358	448
5568Cl	Colon	73658	21674	17932	447
5568D	Duodenum	68241	17664	14407	448
5568F	Faeces	45005	14845	11591	448
5568I	Ileum	159284	69558	52143	445
5568J	Jejunum	157156	80333	25763	445
5568R	Rumen	64611	24215	19653	452
5607A	Abomasum	107689	36713	30088	447
5607Ce	Caecum	137337	52197	39619	451
5607Cl	Colon	39753	14581	12055	451
5607D	Duodenum	136406	41338	31016	447
5607F	Faeces	46896	16253	12484	451
5607I	Ileum	126034	34386	30717	452
5607J	Jejunum	88197	19502	16202	446
5607R	Rumen	62298	20922	16624	452
5732A	Abomasum	99066	33975	23782	451
5732Ce	Caecum	48799	14241	11535	450
5732Cl	Colon	48691	17012	14119	447
5732D	Duodenum	112612	40511	33439	445
5732F	Faeces	49423	16661	13078	447
5732I	Ileum	185540	89734	62456	453
5732J	Jejunum	132966	52545	33847	444
5732R	Rumen	65312	21072	16269	454
5813A	Abomasum	29216	11767	10327	451
5813Ce	Caecum	44453	15533	12643	449
5813Cl	Colon	46657	16241	13141	448
5813D	Duodenum	49793	14519	12604	446
5813F	Faeces	60313	15321	11923	447
5813I	Ileum	96929	23585	17703	442
5813J	Jejunum	192270	117916	13921	442
5813R	Rumen	80553	26296	21530	454
5851A	Abomasum	64392	21624	17713	450
5851Ce	Caecum	49763	16990	12863	449
5851Cl	Colon	56841	21256	17281	448
5851D	Duodenum	26877	10623	9665	446
5851F	Faeces	77489	10637	8300	447
5851I	Ileum	66220	24434	18849	455
5851J	Jejunum	214593	118353	12928	444
5851R	Rumen	53139	11385	8378	452
5936A	Abomasum	27019	11063	10058	445
5936Ce	Caecum	54824	20183	15214	450
5936Cl	Colon	62040	24091	19765	450
5936D	Duodenum	27521	9899	8816	446
5936F	Faeces	62541	22586	17799	450
5936I	Ileum	236106	111679	39436	444
5936J	Jejunum	205817	118932	13480	444
5936R	Rumen	78147	25612	20437	452
5937A	Abomasum	31229	11838	10090	450
5937Ce	Caecum	54862	18369	13887	448
5937Cl	Colon	51567	18379	15374	446
5937D	Duodenum	101071	28551	21583	448
5937F	Faeces	87359	11112	8958	446
5937I	Ileum	67860	26010	17809	440
5937J	Jejunum	39810	13433	12333	443
5937R	Rumen	93441	33898	27312	455
5993A	Abomasum	94273	32658	23074	452
5993Ce	Caecum	44242	16350	12445	452
5993Cl	Colon	47238	13795	11616	451
5993D	Duodenum	87253	25168	18867	447
5993F	Faeces	72973	24987	19915	445
5993I	Ileum	92459	34507	19491	457
5993J	Jejunum	233745	131745	11813	445
5993R	Rumen	61260	17162	14511	454
6008A	Abomasum	27091	10196	8665	450
6008Ce	Caecum	46400	14926	11671	449
6008Cl	Colon	46866	16826	13260	445
6008D	Duodenum	81003	22741	18556	446
6008F	Faeces	43487	11806	8437	446
6008I	Ileum	93672	36559	24044	444
6008J	Jejunum	245208	140425	5799	444
6008R	Rumen	87213	30113	24304	454
6076A	Abomasum	32449	12872	11348	450
6076Ce	Caecum	50555	18508	13952	447
6076Cl	Colon	43885	15950	13073	447
6076D	Duodenum	29764	12882	11886	445
6076F	Faeces	57958	15933	12377	446
6076I	Ileum	228232	105918	39057	456
6076J	Jejunum	161630	78138	40184	443
6076R	Rumen	74355	15219	11142	453
6081A	Abomasum	28747	11849	10175	453
6081Ce	Caecum	41340	13824	10284	448
6081Cl	Colon	43886	13891	11610	449
6081D	Duodenum	65999	21240	16806	449
6081F	Faeces	114787	32711	23350	449
6081I	Ileum	59231	19410	15900	445
6081J	Jejunum	230730	122524	43054	448
6081R	Rumen	48882	13118	10948	455
6105A	Abomasum	30543	11419	9987	449
6105Ce	Caecum	36444	13653	10518	449
6105Cl	Colon	57136	21893	17985	448
6105D	Duodenum	37452	14653	13296	446
6105F	Faeces	57962	19279	14808	446
6105I	Ileum	176451	79578	55648	459
6105J	Jejunum	186586	90277	36074	452
6105R	Rumen	60908	21938	17284	451
6153A	Abomasum	28459	11065	9611	452
6153Ce	Caecum	52372	18554	14855	447
6153Cl	Colon	39154	14165	11610	446
6153D	Duodenum	52713	17428	14457	444
6153F	Faeces	59359	17264	13553	446
6153I	Ileum	263511	135844	46787	459
6153J	Jejunum	164790	85828	46734	460
6153R	Rumen	48198	15532	12337	456
